# Supplementary material for: Flipped learning in faculty development programs: opportunities for greater faculty engagement, self-learning, collaboration and discussion
Source: publisher site journal article supplement (doi:10.1515/tjb-2021-0071), 2021-06-03
Supplement: Supplementary file 1 [file j_tjb-2021-0071_suppl_002.doc]

**APPENDIX-II**

Developing a Key Features* Problem

1. Define a clinical problem. (*e.g. Migraine, Seizure, etc.*)

Important, frequently morbid-mortal or causes disability in the population, most frequently seen at inpatient / outpatient settings, a domain from your learning objectives list etc.

1. Define the population/groups/individuals under the risk of clinical problem.

Age, gender, occupation, ethnic-social groups etc.

1. Select (or write) appropriate option below to the clinical situation.

a. Undiagnosed case (or clinical problem)

b. Typical case (or clinical problem)

c. Multi-system case (or clinical problem)

d. Life threatening situation (or clinical problem)

e. Preventive medicine case (or clinical problem)

f. Other ________________

1. Duration of the clinical situation.

Acute, chronic, remission, exacerbation etc.

1. Previous intervention(s).

Preventive, dietary, exercise, immunization, medical/surgical treatment, rehabilitation etc.

1. Define “Key Features*” of the clinical problem.

*(Write down 5-10 Key Features and select most important 3-5)*

* *Key Features* are unique, essential elements in decision making -*of the clinical case*- which, alone or in combination, are the critical steps in the successful resolution of the clinical problem1,2.

*Key Features*, focuses on a step in which examinees are most likely to make errors and It is a difficult aspect of the identification and management of the problem in practice3.

Interpretation of history and physical examination. Seek critical physical findings.

Ordering / interpretation of diagnostic tests / procedures.

Managing the case, investigations for urgent medical intervention(s).

Appropriate prescription, explanations to the patient, follow-up.

Evaluation of previous treatment and patient compliance.

Exacerbating factors etc. *[Learning objectives could be helpful at this step]*

1. Write down your clinical case scenario using the information above (step 1 to 6).

[Insert selected “Key Features” into the case scenario. Try to write a realistic scenario]

1. Write down your questions (2-5 questions) using the information at step 6.

Try to make it short answer “write in” format and ask for limited answers.

1. Write down all possible answers for each question.
2. Define minimum acceptable responses for solving the case (*number or specific answers*).

References:

1. Page G, Bordage G. The Medical Council of Canada’s key features project: a more valid written examination of clinical decision-making skills. Acad Med 1995;70:104–10.

2. Elizabeth A Farmer & Gordon Page (2005), A practical guide to assessing clinical decision-making skills using the key features approach, 2005. Medıcal Educatıon; 39: 1188–1194.

3. Page G, Bordage G, Allen T. Developing key features problems and examinations to assess clinical decision making skills. Acad Med 1995;70:194–201.

4. Hatala, R., Norman, G.R., Adapting the Key Features Examination for a Clinical Clerkship, Medical Education, 36, 160-165, 2002.

Example of Key Features Problem*

1. Clinical problem : Asthma
2. Risk group : Young Adults
3. Clinical situation : Life threatening
4. Duration : Chronic, started in childhood
5. Previous interventions: Diagnosed, under medical treatment, non-compliant to treatment
6. Key Features of the clinical problem.

For a young adult, with past history of asthma who presents in respiratory distress, the physician should:

**a.** identify common precipitants,

**b.** interpret arterial blood gases, recognizing the danger of normal gases,

**c.** select appropriate initial management including bronchodilators and steroids

1. Clinical case scenario.

Mr F, a 25-year-old-male with asthma since childhood, is referred to you by the emergency room physician with acute shortness of breath. Over the past 48 h Mr F has developed a dry cough and has needed to use 2 puffs of salbutamol every 2 h for his shortness of breath, with little relief. He has no other medical problems and is generally non-compliant with regular inhaler use. On examination today he looks distressed and is only able to speak 2 words per breath. T= 37.9 °C; HR= 130, regular; BP=110/70 with 50 mmHg pulsus paradoxus; RR =40. He is using his accessory muscles of respiration. Trachea is midline. Chest examination reveals equal but diminished breath sounds bilaterally with no audible wheeze.

Arterial blood gases on 35% oxygen indicate

pH=7.40, pCO2=5.32 kPa, pO2= 7.98 kPa, bicarbonate=24 mmol/L,

oxygen saturation of 92%.

1. Questions

**1.** What are the most important abnormalities (history, physical or lab values) that indicate this patient is in severe respiratory distress? List up to 3.

**2.** What medications will you order immediately? List up to 5.

**3.** What are the possible triggers for Mr F's asthma exacerbation? List up to 6.

1. Minimal acceptable responses*1*.

1. Normal pCO2

2. steroids, salbutamol, ipratropium

3. infection, allergen, noncompliance

***1****Each question was scored using a dichotomous scoring system; with `1' for listing the minimally acceptable correct responses, and `0' for not meeting this minimally acceptable level.*

* Adapted from Hatala, R., Norman, G.R., Adapting the Key Features Examination for a Clinical Clerkship, Medical Education, 36, 160-165, 2002.
